# Supplementary material
Source: bioRxiv or medRxiv preprint supplement (https://www.biorxiv.org/highwire/filestream/10023/field_highwire_adjunct_files/0/037218-1.pdf)

# S1 Figure

## A

### qRT PCR of SPARC overexpression lines

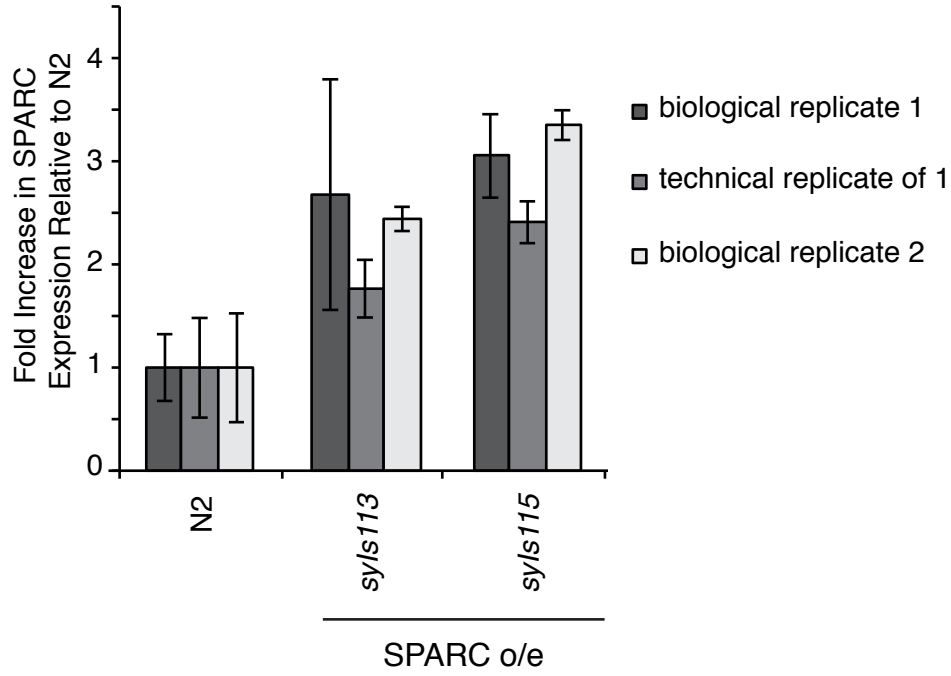

## B

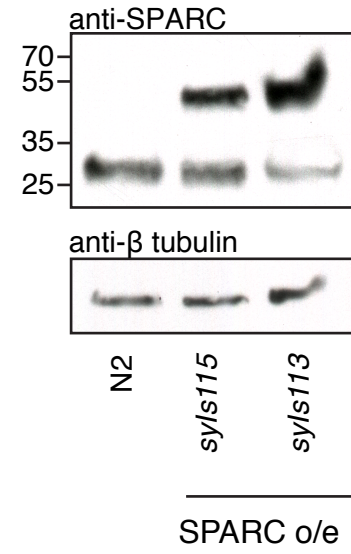

Supplement: Supplementary file [file 037218-1.pdf]
